# Supplementary material
Source: Elsevier journal article supplement (https://www.sciencedirect.com/science/article/pii/S2530064423000020)
Supplement: mmc1 [file S2530064423000020:mmc1.docx]

**Appendix 2. References of logos used in Figure 1.**

This appendix lists the logos used to construct Figure 1 of the manuscript “Global South leadership towards inclusive tropical ecology and conservation”. The logos are organized on the table from left to right of the original figure. All logos listed here were obtained from [www.thenounproject.com](http://www.thenounproject.com). Logos included in the figure and not mentioned here were independently drawn by Carolina Ocampo-Ariza and Manuel Toledo-Hernández.

| **Action title** | **Logo Name** | **Author** | **Link** |
| --- | --- | --- | --- |
| Diverse teams | collaboration | Iconathon | <https://thenounproject.com/icon/collaboration-2909353/> |
| Co-develop | teamwork | Gerald Wildmoser | <https://thenounproject.com/icon/teamwork-146627/> |
| Transparent management | transparency | SBTS | <https://thenounproject.com/icon/transparency-4383449/> |
| Political engagement | Megaphone | Nicolas Vincent | <https://thenounproject.com/icon/megaphone-115961/> |
| Research policy | leaves | Made | <https://thenounproject.com/icon/leaves-1993997/> |
| Funding access | scientist | Iconathon | <https://thenounproject.com/icon/scientist-2909361/> |
| DEI globally | globe | Nicolas Menghini | <https://thenounproject.com/icon/globe-10812/> |
