# Supplementary material
Source: Elsevier journal article supplement (https://www.sciencedirect.com/science/article/pii/S2530064423000020)
Supplement: mmc2 [file S2530064423000020:mmc2.pdf]

## **LIDERAZGO DEL SUR GLOBAL HACIA UNA ECOLOGÍA Y CONSERVACIÓN TROPICAL INCLUYENTES**

### **Palabras clave**

Equidad, diversidad, inclusión, actores locales, colaboración internacional, decolonizar.

### **Resumen**

La comunidad científica en ecología y conservación tropical tiene como meta fortalecer la participación de los investigadores del Sur Global, pero las sugerencias para mejorar la inclusión se han dirigido predominantemente hacia instituciones e investigadores del Norte Global. Aunque estas mejoras son cruciales, existen retos únicos para el Sur Global en cuanto a diversidad, equidad e inclusión (DEI), impuestos por sus contextos socioeconómicos, culturales y científicos. El liderazgo y acción de comunidades en el Sur Global es indispensable para generar y mantener soluciones sostenibles contra las más importantes amenazas a la biodiversidad tropical, por ello, mejoras en DEI en el Sur Global son primordiales para contrarrestar la actual crisis de biodiversidad. Aquí, proponemos diez acciones clave hacia colaboraciones internacionales equitativas en ecología tropical, que lideradas por investigadores del Sur Global pueden mejorar la DEI a nivel institucional, nacional e internacional. A nivel institucional, recomendamos (1) convertirse en modelos de DEI, (2) codesarrollar la investigación con partes interesadas locales y (3) promover una gestión transparente de la financiación para favorecer a los científicos locales. A nivel nacional, animamos a (4) comprometerse en acciones políticas que protejan a los científicos y sus investigaciones en los países tropicales, (5) participar en la mejora de las políticas de investigación sobre biodiversidad, e (6) idear investigaciones que lleguen a la sociedad. A nivel internacional, alentamos a los investigadores del Sur Global que colaboran a nivel internacional a (7) liderar y dirigir las solicitudes de financiación, (8) garantizar cargas de trabajo equitativas y (9) abogar por la igualdad de beneficios entre colaboradores nacionales y extranjeros. Finalmente, (10) proponemos que el liderazgo del Sur Global en los esfuerzos globales tiene el mayor potencial para mejorar la DEI en todo el mundo, garantizando cambios positivos y duraderos en nuestra comunidad científica. Los materiales suplementarios ofrecen este resumen en otros idiomas hablados en el Sur Global.
