# Supplementary material
Source: Elsevier journal article supplement (https://www.sciencedirect.com/science/article/pii/S2530064423000020)
Supplement: mmc3 [file S2530064423000020:mmc3.pdf]

## **RENFORCER LE LEADERSHIP DES PAYS DU SUD POUR RENDRE L'ÉCOLOGIE ET LA CONSERVATION TROPICALES INCLUSIVES**

### **Mots clés**

Équité, diversité, inclusion, acteurs locaux, collaborations internationales, décolonisation.

### **Résumé**

Renforcer la participation des chercheurs des pays du Sud dans le domaine de l'écologie et de la conservation tropicales est un objectif de notre communauté scientifique, mais les suggestions pour rendre la recherche plus inclusive sont principalement destinées aux institutions et aux chercheurs des pays du Nord. Bien qu'il soit crucial d'améliorer les conditions de recherche, il existe des défis uniques pour la diversité, l'équité et l'inclusion (DEI) au sein des pays du Sud, imposés par leurs contextes socio-économiques, culturels et scientifiques. Par conséquent, il est essentiel d'ancrer ces changements dans les pays du Sud pour qu'ils aient un impact durable pour promouvoir la DEI au niveau global, afin de permettre à l'écologie tropicale et la recherche sur la conservation de faire face à la crise actuelle de la biodiversité. Nous proposons dix actions clés en faveur de collaborations internationales équitables dans le domaine de l'écologie tropicale et la conservation qui, menées par des chercheurs du Sud, visent à améliorer la DEI aux niveaux institutionnel, national et international. Au niveau institutionnel, nous recommandons (1) d'adopter des postures exemplaires de DEI, (2) de co-développer la recherche avec les parties prenantes locales, et (3) de promouvoir une gestion transparente du financement afin de favoriser les scientifiques locaux. Au niveau national, nous encourageons (4) l'engagement dans des actions politiques protégeant les scientifiques et leurs recherches dans les pays tropicaux, (5) la participation à l'amélioration des politiques de recherche sur la biodiversité, et (6) la conception d'études qui touchent la société. Au niveau international, nous encourageons les chercheurs du Sud dans les collaborations internationales à (7) mener et diriger les demandes de financement, (8) à assurer des charges de travail équitables, et (9) à plaider pour des avantages égaux entre les collaborateurs nationaux et étrangers. Enfin, (10) nous pensons que le leadership du Sud dans les efforts globaux a le plus

grand potentiel pour améliorer la DEI dans le monde, et ainsi garantir que les changements dans notre communauté scientifique soient positifs et durables. Des traductions de ce résumé dans d'autres langues parlées dans les pays du Sud sont disponibles en annexes.
