# Supplementary material
Source: Elsevier journal article supplement (https://www.sciencedirect.com/science/article/pii/S2530064423000020)
Supplement: mmc4 [file S2530064423000020:mmc4.pdf]

## **LIDERANÇA DO SUL GLOBAL RUMO A UMA ECOLOGIA E CONSERVAÇÃO TROPICAL INCLUSIVA**

### **Palavras-chave**

Equidade, diversidade, inclusão, partes interessadas locais, colaborações internacionais, descolonização.

### **Resumo**

O fortalecimento da participação de pesquisadores do Sul Global na ecologia e conservação tropical é um objetivo de nossa comunidade científica, mas as sugestões para melhorar a inclusão são dirigidas principalmente às instituições e pesquisadores do Norte Global. Embora estas melhorias sejam cruciais, existem desafios únicos para a diversidade, equidade e inclusão (DEI) dentro do Sul Global impostos por seus contextos sócio-econômicos, culturais e científicos. Portanto, mudanças enraizadas no Sul Global são essenciais para mudanças duradouras rumo à DEI, que garantam que a pesquisa em ecologia e conservação tropical se contraponha a atual crise de biodiversidade. Propomos dez ações-chave para colaborações internacionais equitativas em ecologia tropical, que, lideradas por pesquisadores do Sul Global, podem melhorar a DEI em nível institucional, nacional e internacional. Em nível institucional, recomendamos (1) tornar-se modelos para a DEI, (2) co-desenvolver a pesquisa com os atores locais, e (3) promover uma gestão transparente do financiamento para favorecer os cientistas locais. Em nível nacional, incentivamos (4) o engajamento em ações políticas de proteção aos cientistas e suas pesquisas em países tropicais, (5) a participação na melhoria das políticas de pesquisa em biodiversidade e (6) a elaboração de pesquisas que cheguem à sociedade. Em nível internacional, encorajamos os pesquisadores do Sul Global a fazer parte de colaborações internacionais a (7) liderar e dirigir propostas de financiamento, (8) assegurar cargas de trabalho equitativas, e (9) defender benefícios iguais entre colaboradores nacionais e estrangeiros. Finalmente, (10) propomos que a liderança do Sul Global nos esforços globais tem o maior potencial para melhorar a DEI em todo o mundo, garantindo mudanças positivas duradouras em toda a nossa comunidade científica. Materiais suplementares disponibilizam este resumo em outros idiomas falados no Sul Global.
