# Supplementary material
Source: Elsevier journal article supplement (https://www.sciencedirect.com/science/article/pii/S2530064423000020)
Supplement: mmc5 [file S2530064423000020:mmc5.pdf]

## قيادة الجنوب العالمي نحو علم البيئة الاستوائية الشاملة والمحافظة عليها

### الكلمات الأساسية

الإنصاف، والتنوع، والتضمين، وأصحاب المصلحة المحليين، والتعاون الدولي، إنهاء الاستعمار.

### ملخص

إن تعزيز مشاركة باحثي الجنوب العالمي في البيئة الاستوائية والحفظ هو هدف لمجتمعنا العلمي، لكن الاقتراحات لتحسين التضامن الموجهة في الغالب إلى مؤسسات وباحثين الشمال العالمي في حين أن هذه التحسينات ضرورية، إلا أن هناك تحديات فريدة للتنوع والإنصاف والتضمين (DEI) داخل الجنوب العالمي تفرضها سياقاتها الاجتماعية والاقتصادية والثقافية والعلمية. لذلك، فإن التغييرات المتجذرة في الجنوب العالمي ضرورية للتغييرات طويلة الأمد نحو الـ DEI، مما يضمن أن تجري بحوث في البيئة الاستوائية وحفظ البيئة في مواجهة أزمة التنوع البيولوجي الحالية. ونقترح عشرة إجراءات رئيسية للتعاون الدولي المنصف في مجال علم البيئة الاستوائية، يمكن تحسين التنوع والإنصاف والتضمين على المستويات المؤسسية والوطنية والدولية، إذا كانت بقيادة باحثين من الجنوب العالمية. وعلى المستوى المؤسسي، نوصي بأن يصبح (1) نماذج يحتذى بها للـ DEI (2)، وأن تشارك في تطوير البحوث مع أصحاب المصلحة المحليين، و(3) تشجيع إدارة التمويل الشفافة لصالح العلماء المحليين. وعلى الصعيد الوطني، نشجع (4) المشاركة في الإجراءات السياسية التي تحمي العلماء وأبحاثهم في البلدان الاستوائية، (5) المشاركة في تحسين سياسات بحوث التنوع البيولوجي، (6) استنباط البحوث التي تصل إلى المجتمع. وعلى المستوى الدولي، نشجع الباحثين العالميين من بلدان الجنوب في التعاون الدولي لـ (7) قيادة وتوجيه طلبات التمويل، (8) ضمان عدالة أعباء العمل، و(9) الدعوة إلى تحقيق فوائد متساوية بين المتعاونين الوطنيين والأجانب. وأخيراً، (10) نقترح أن تكون قيادة الجنوب العالمي في الجهود العالمية هي الأكثر قدرة على تحسين الـ DEI في مختلف أنحاء العالم، وضمان إحداث تغييرات إيجابية طويلة الأمد في مجتمعنا العلمي. وتقدم المواد التكميلية لهذه المخطوطة بلغات أخرى منطوقة في بلدان الجنوب.
