# Supplementary material
Source: Elsevier journal article supplement (https://www.sciencedirect.com/science/article/pii/S2530064423000020)
Supplement: mmc6 [file S2530064423000020:mmc6.pdf]

## 全球南方在包容性热带生态和保护方面的主导地位

**摘要:** 强化全球南方研究人员对热带生态与保护的参与是科学界的重要目标之一，但当前关于改善包容性的建议主要针对全球北方的研究机构和研究人员。尽管这些改进至关重要，但全球南方迥异的社会经济、文化和科学背景给多样性、公平性和包容性（DEI）带来了独特的挑战。因此，基于全球南方自身实际情况做出调整对于 DEI 的长期改善尤为关键，有助于确保热带生态和保护研究能够对抗当前的生物多样性危机。我们提出了十项关键行动，以实现热带生态学领域的公平国际合作，这些行动由全球南方研究人员主导，可以在机构、国家和国际层面改善 DEI。在机构层面，我们建议（1）成为 DEI 的榜样，（2）与当地利益相关者共同开展研究，以及（3）促进透明的资金管理，以支持当地科学家；在国家层面，我们鼓励（4）参与保护热带国家科学家及其研究的政治行动，（5）参与改善生物多样性研究政策，以及（6）设计面向社会的研究；在国际层面，我们鼓励全球南方研究人员在国际合作中（7）主导并直接资助申请，（8）确保公平的工作量，以及（9）倡导国内外合作者之间的平等利益。最后，（10）我们建议，全球南方在全球努力中的主导地位最有可能改善全球的 DEI，保证我们科学界的长期积极变革。补充材料以全球南方使用的其他语言提供了这一摘要。

**关键词:** 公平性; 多样性; 包容性; 当地利益相关者; 国际合作; 非殖民化
