# Supplementary material
Source: Elsevier journal article supplement (https://www.sciencedirect.com/science/article/pii/S2530064423000020)
Supplement: mmc18 [file S2530064423000020:mmc18.pdf]

## KEPEMIMPINAN *GLOBAL SOUTH* UNTUK MEWUJUDKAN BIDANG EKOLOGI DAN KONSERVASI TROPIS YANG INKLUSIF

### Kata kunci:

Kesetaraan, keragaman, inklusi, pemangku kepentingan lokal, kolaborasi internasional, mendekolonisasi

### Abstrak:

Memperkuat partisipasi peneliti *Global South* dalam bidang ekologi dan konservasi tropis merupakan target komunitas ilmiah kita, tetapi saran untuk meningkatkan inklusi sebagian besar diarahkan kepada lembaga dan peneliti *Global North*. Meskipun kemajuan ini sangat penting, ada tantangan unik untuk keragaman, kesetaraan dan inklusi (DEI) di *Global South* yang muncul karena konteks sosial-ekonomi, budaya dan ilmiahnya. Oleh karena itu, perubahan yang berakar di *Global South* sangat penting untuk perubahan jangka panjang menuju DEI, yang menjamin bahwa penelitian ekologi dan konservasi tropis dapat mengatasi krisis keanekaragaman hayati saat ini. Kami mengusulkan sepuluh tindakan kunci menuju kolaborasi internasional yang setara dalam bidang ekologi tropis, yang dipimpin oleh peneliti *Global South* dan dapat meningkatkan DEI di tingkat kelembagaan, nasional dan internasional. Pada tingkat kelembagaan, kami merekomendasikan (1) menjadi panutan untuk DEI, (2) mengembangkan penelitian bersama dengan para pemangku kepentingan lokal, dan (3) mempromosikan manajemen pendanaan yang transparan untuk mendukung ilmuwan lokal. Di tingkat nasional, kami mendorong (4) keterlibatan dalam aksi politik yang melindungi ilmuwan dan penelitian mereka di negara-negara tropis, (5) partisipasi dalam meningkatkan kebijakan penelitian keanekaragaman hayati, dan (6) merancang penelitian yang menjangkau masyarakat. Di tingkat internasional, kami mendorong para peneliti *Global South* dalam kolaborasi internasional untuk (7) memimpin dan mengelola aplikasi pendanaan, (8) memastikan beban kerja yang adil, dan (9) mengadvokasi manfaat yang sama di antara kolaborator nasional dan kolaborator asing. Terakhir, (10) kami mengusulkan bahwa kepemimpinan *Global South* dalam upaya global memiliki potensi paling besar untuk meningkatkan DEI di seluruh dunia, menjamin perubahan positif yang bertahan lama dalam komunitas ilmiah kita. Bahan tambahan berisi naskah ini dalam bahasa lainnya yang digunakan di *Global South*.
